# Supplementary material for: N-acetylcysteine use among patients undergoing cardiac surgery: A systematic review and meta-analysis of randomized trials
Source: PubMed Central journal article supplement (PMC6508704; doi:10.1371/journal.pone.0213862), 2019-05-09

# Panel A

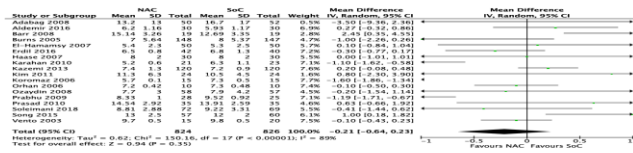

# Panel B

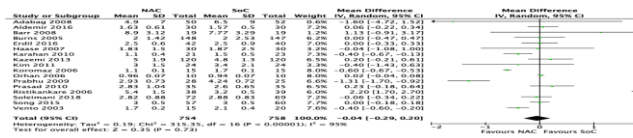

Supplement: pone.0213862.s004.pdf [file pone.0213862.s004.pdf]
