# Supplementary material for: N-acetylcysteine use among patients undergoing cardiac surgery: A systematic review and meta-analysis of randomized trials
Source: PubMed Central journal article supplement (PMC6508704; doi:10.1371/journal.pone.0213862), 2019-05-09

Panel A. Mortality

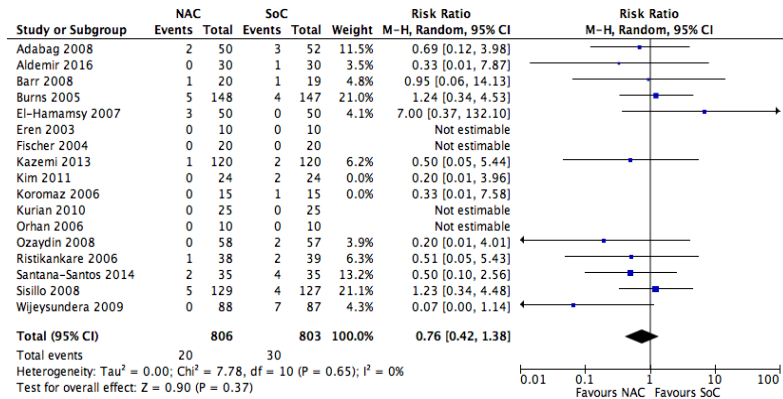

Panel B. Acute renal insufficiency

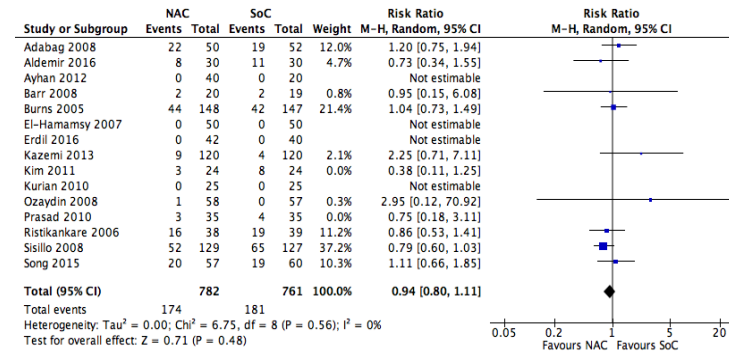

Panel C. Cardiac insufficiency

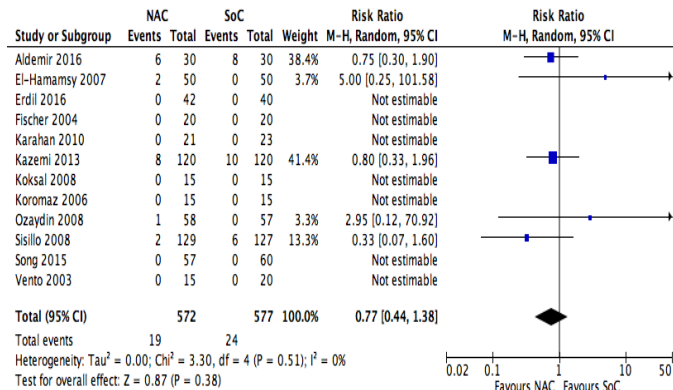

Panel D. Hospital length of stay

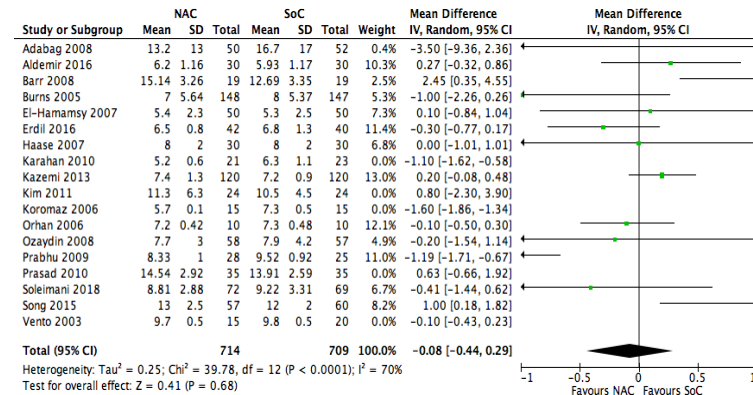

Panel E. Intensive care unit length of stay

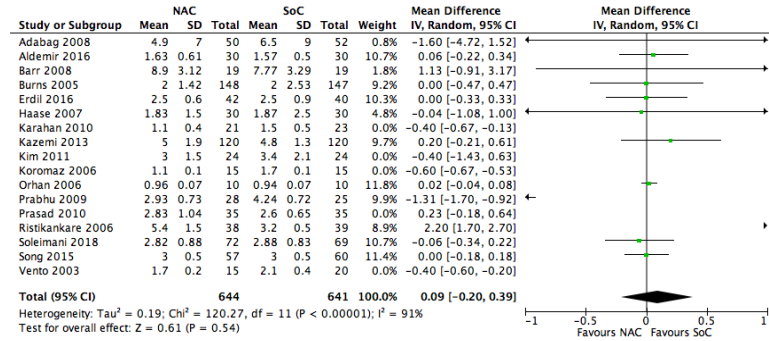

Panel F. Arrhythmia

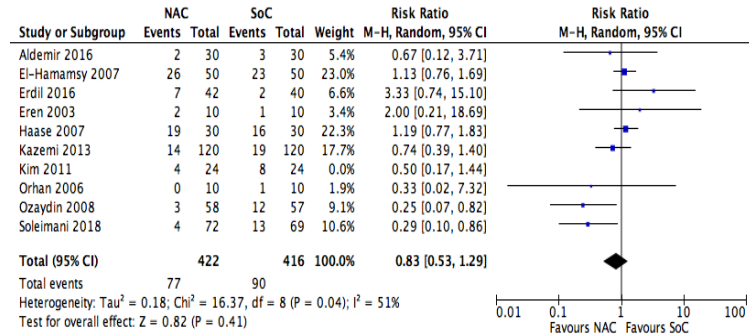

Panel G. Acute myocardial infarction

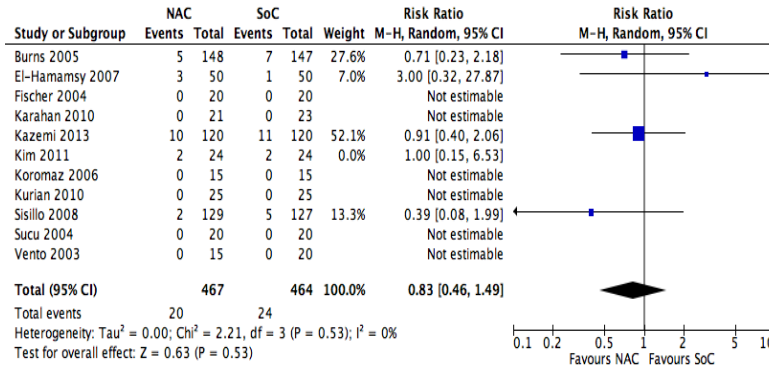

Supplement: pone.0213862.s005.pdf [file pone.0213862.s005.pdf]
